# Supplementary material for: Arsenic, Cadmium and Lead Levels in School Meals and Their Risk Assessment in Municipalities of Bahia, Brazil
Source: Preprints.org preprint supplement (doi:10.20944/preprints202401.1520.v1), 2024-01-22
Supplement: Supplementary file 1 [file supplementary]

**Supplementary**

Table S1. Characterization of the study municipalities.

| **Municipalities** | **IDEB¹ (2017)** | **IDH²**  **(2010)** | **Geographical location** | **Population (2019)** | **Per capita income³** | **No. of enrollments (E. F.)4** |
| --- | --- | --- | --- | --- | --- | --- |
| **Brumado** | 6.1 | 0.656 | Southwest Bahia | 67.195 | R$ 403,00 | 15.128 |
| **Jacobina** | 4.9 | 0.649 | Chapada Diamantina | 80.518 | R$ 417,00 | 20.205 |
| **Jaguaripe** | 4.3 | 0.556 | Recôncavo Baiano | 18.788 | R$ 247,00 | 4.332 |
| **Salvador** | 5.3 | 0.759 | East/coast | 2.872.347 | R$ 973,00 | 519.719 |

¹ Basic Education Development Index (INEP, 2017) ² Human Development Index ³Average per capita income for the population over 10 years of age who work without taking gender into account in the last census of 2010 (IBGE, 2019); 4Number of students enrolled in elementary school in 2019, according to data from the school census (IBGE, 2019).
